# Supplementary material for: Recent past (1979–2014) and future (2070–2099) isoprene fluxes over Europe simulated with the MEGAN–MOHYCAN model
Source: Copernicus journal article supplement (doi:10.5194/bg-15-3673-2018), 2018-06-19
Supplement: Supplementary file 1 [file bg-15-3673-2018-supplement.pdf]

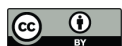

## *Supplement of*

# **Recent past (1979–2014) and future (2070–2099) isoprene fluxes over Europe simulated with the MEGAN–MOHYCAN model**

**Maite Bauwens et al.**

*Correspondence to:* Maite Bauwens ([maite.bauwens@aeronomie.be](mailto:maite.bauwens@aeronomie.be))

The copyright of individual parts of the supplement might differ from the CC BY 4.0 License.

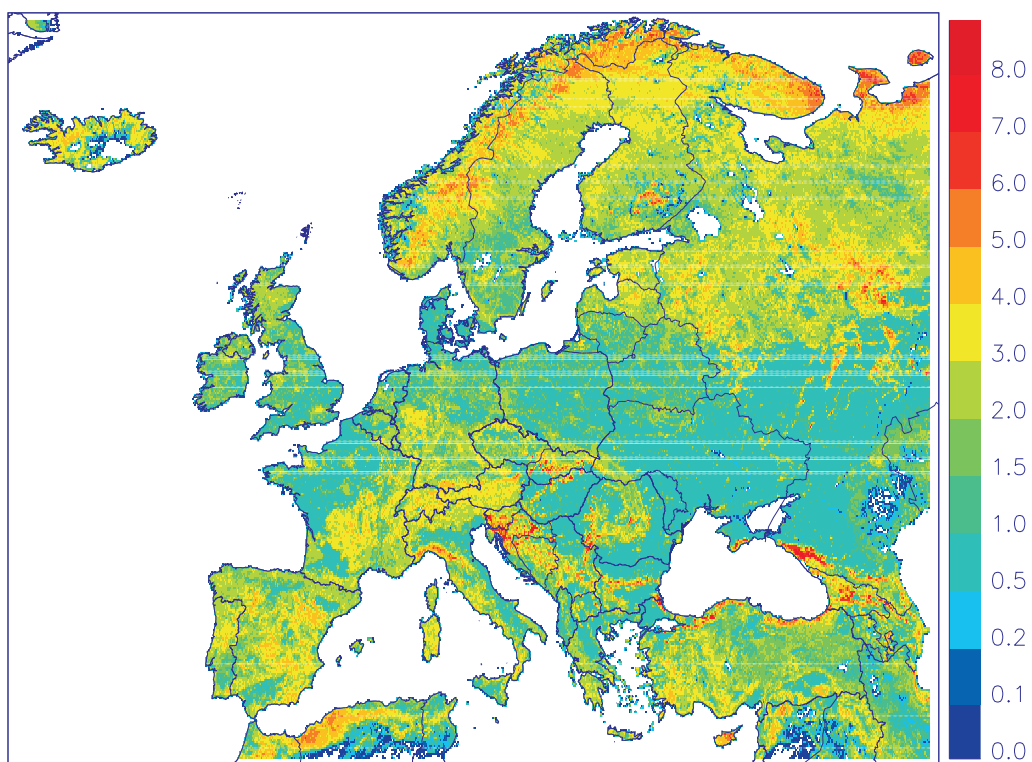

**Figure S1.** Standard emission factors from MEGANv2.1 expressed in  $\text{mg m}^{-2} \text{h}^{-1}$ .

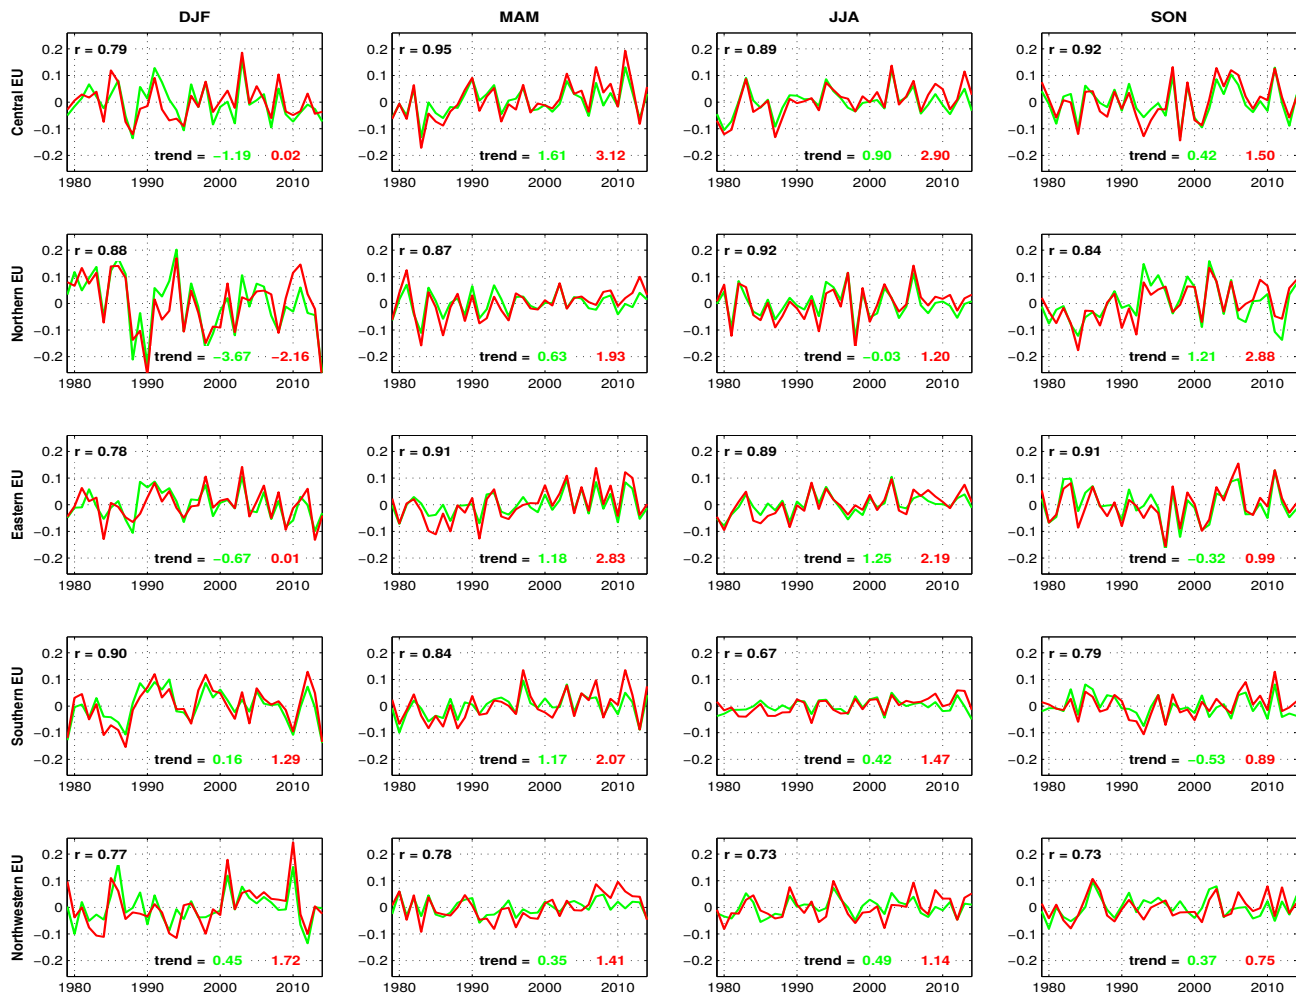

**Figure S2.** Seasonal surface solar radiation anomaly data according to the ECMWF model (green) and according to ground-based observations (red). The calculated decadal trends (%/decade) and correlation coefficients are inset. DJF: December-January-February; MAM: March-April-May; JJA: June-July-August; SON: September-October-November.

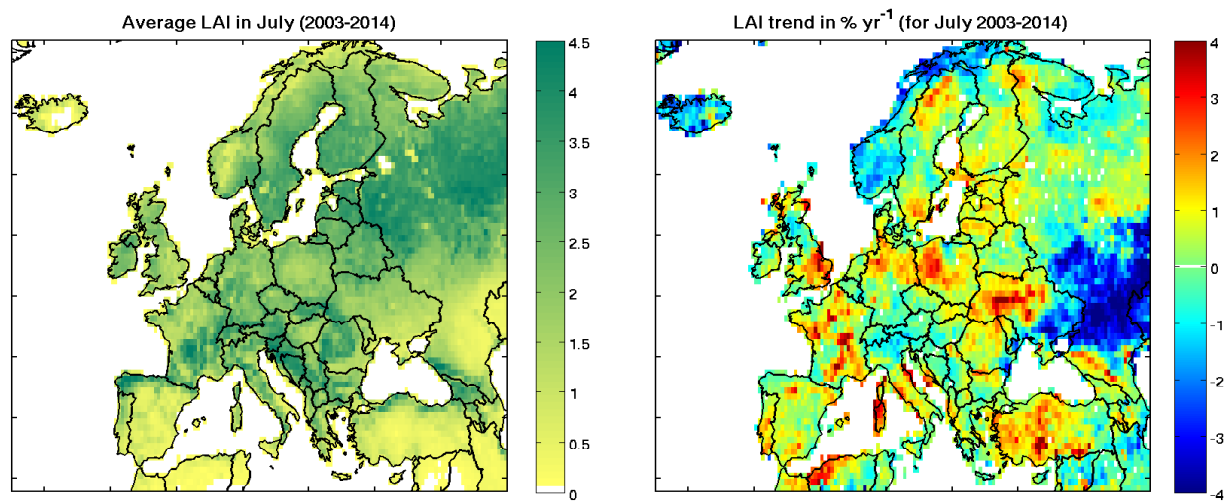

**Figure S3.** Distribution of average LAI over Europe in July averaged over 2003-2014, and the calculated LAI trend over this period.

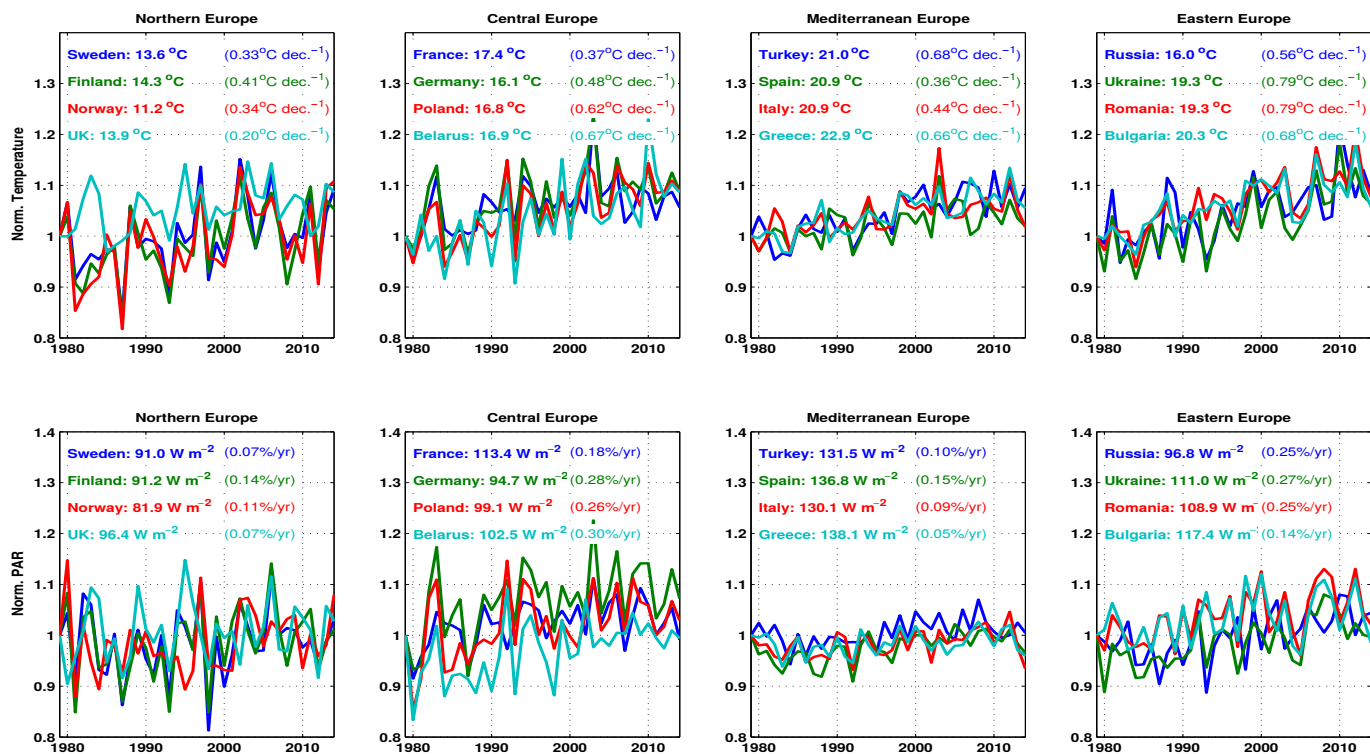

**Figure S4.** Interannual variability and trend in ERA-Interim ECMWF summer temperatures and solar radiation for 16 countries of northern, central, Mediterranean and eastern Europe. The data are normalized to their 1979 values, and the average for that year is given in the upper left corner.

Landscape heterogeneity: model versus local vegetation composition

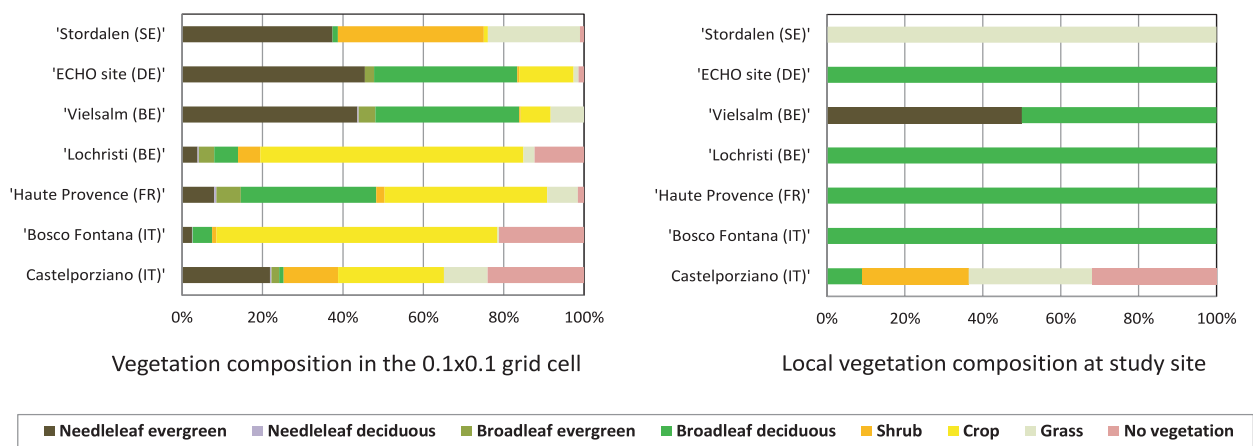

**Figure S5.** Landscape composition at the measurement sites shown in Fig. 4, as assumed in the model grid cell (left), and based on the corresponding literature studies (right). For sites where the precise percentages are not reported (e.g. Castelporziano), an assumption is made based on the site description as provided in the corresponding publication.

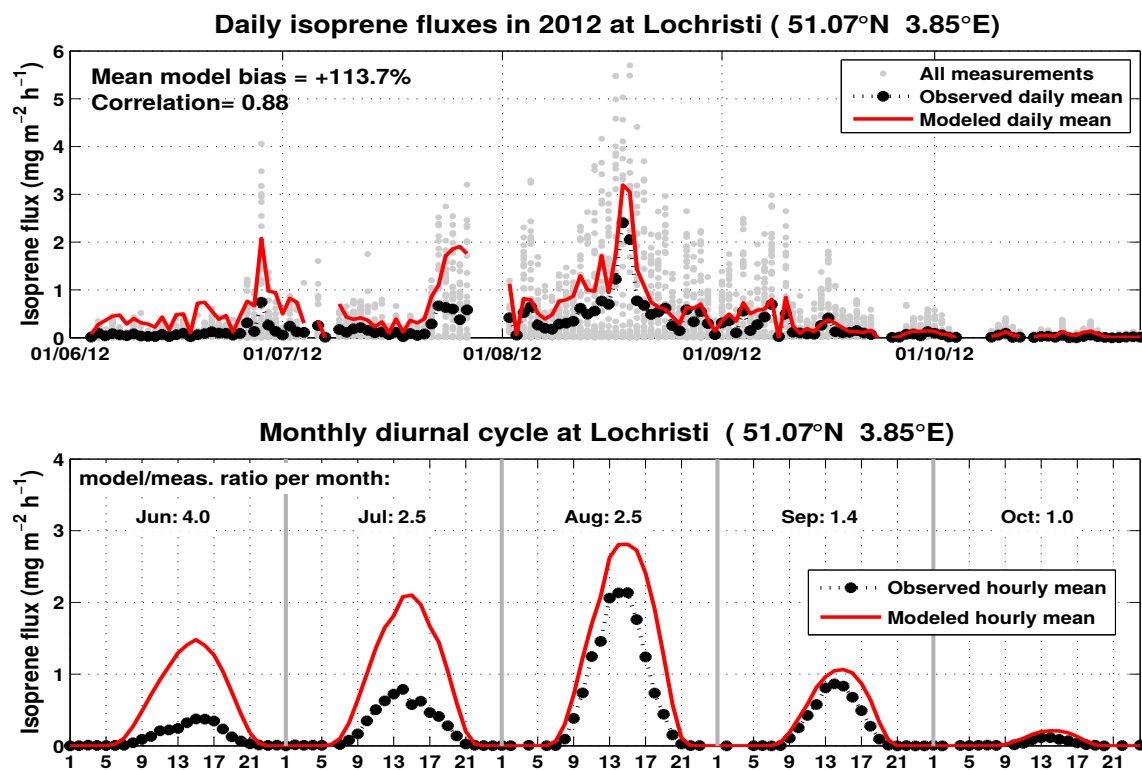

**Figure S6.** Upper panel : Modeled (red) and measured (black and gray) daily isoprene fluxes in Lochristi (Belgium) in 2012 (Brilli et al. 2014). The model (H3 simulation) uses the emission factor for broadleaf trees recommended in the MEGAN model ( $10 \text{ mg m}^{-2} \text{h}^{-1}$ ). Lower panel : monthly diurnal cycle for the modeled (red) and measured (black) isoprene fluxes. The monthly ratio of the model to the measured flux is given inset.

## The ALARO regional climate model

In Fig. S6 we compare the ALARO fields with the ERA-Interim fields over the control period 1976-2005 for temperature and shortwave solar radiation (Fig. S6). The average temperature of ALARO over land is estimated at 4.9°C for the full domain (34-70°N, 25°W-50°E), by 2.1°C lower than the average ECMWF temperature over 1979-2005. The cold bias of ALARO compared to ECMWF data reaches -6°C in mountainous regions and in northeastern Europe, but it does not exceed -2°C in central Europe. On the other hand, Fig. S6 shows a positive irradiance bias of ALARO compared to the ECMWF fields. The differences are strongest over Scandinavia, Russia and Turkey, whereas almost negligible or negative in western Europe.

The use of the ALARO meteorology results in 35% lower mean isoprene emission over the European domain, i.e. 4.6 vs. 6.2 Tg/yr, with the strongest decrease (up to 90%), in southern Europe. The relatively low isoprene emission obtained over most parts of Europe using the ALARO meteorological fields are mostly due to the low temperature bias. Over Ukraine, Poland and Belarus isoprene emissions are ca. 20% higher in the ALARO simulation. In Scandinavia and over northern Russia the negative temperature bias is somewhat counteracted by the positive irradiance bias, resulting in a weak emission difference. Overall, the use of ALARO meteorology results in lower isoprene emissions compared to the H1-H3 estimates.

Surface temperature, precipitation and surface shortwave radiation for the different RCP scenarios are compared to the control run in Fig. S7.



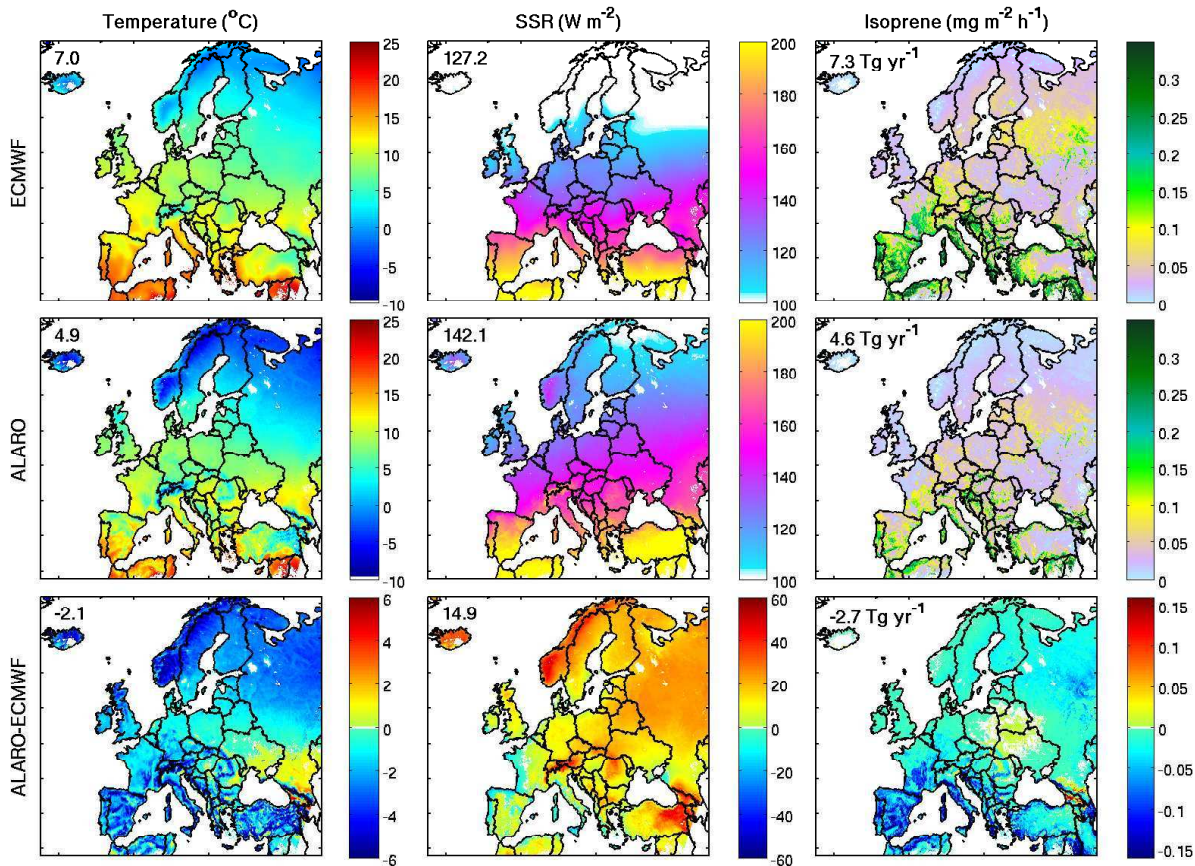

**Figure S7.** Mean annual temperature ( $^{\circ}\text{C}$ ), irradiance ( $\text{Wm}^{-2}$ ) and isoprene flux ( $\text{mg m}^{-2}\text{h}^{-1}$ ) according to ERA-Interim ECMWF (upper panels) and ALARO (middle panels) meteorological fields. The lower panels show the absolute difference between the ALARO model and the ERA-Interim ECMWF data. The numbers inside the panels denote the domain average.

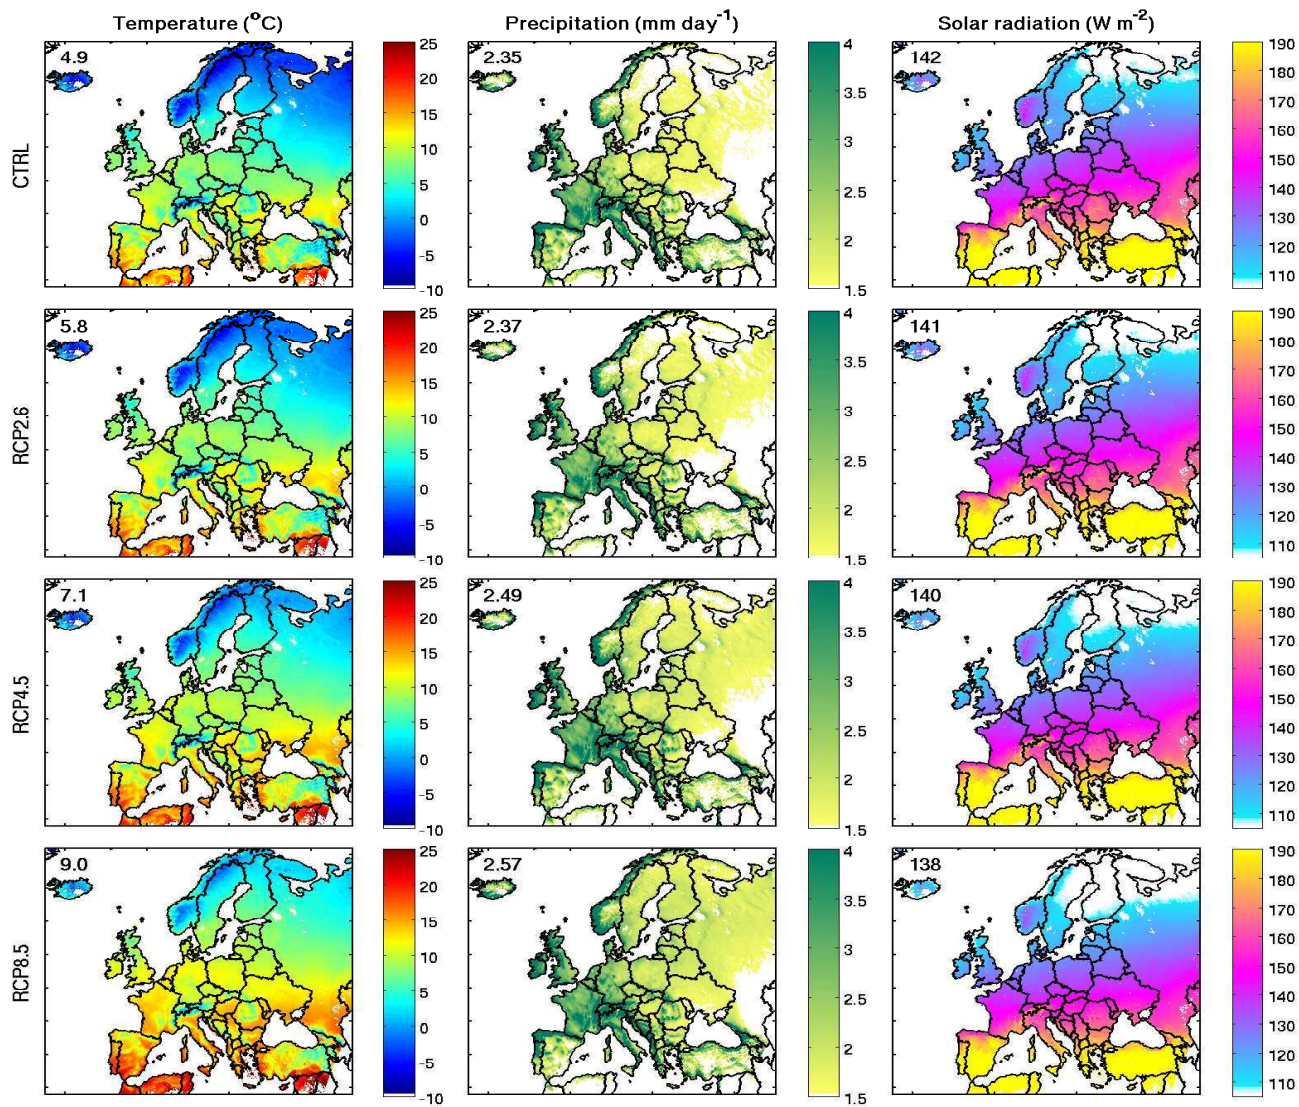

**Figure S8.** Surface temperature, precipitation and surface shortwave radiation for the different RCP scenarios, compared to the control run (Table 1). The corresponding means are given inside each panel.
